# Supplementary material for: The lingering effects of Neanderthal introgression on human complex traits
Source: eLife journal article supplement (doi:10.7554/elife.80757), 2023-03-20

- Anthropometry
- Autoimmune disorders
- Blood biochemistry
- Blood pressure
- Bone densitometry
- Environmental factors
- Eye
- General medical information
- Glucose metabolism
- Kidney
- Lipid metabolism
- Liver
- Lung
- Skin and hair

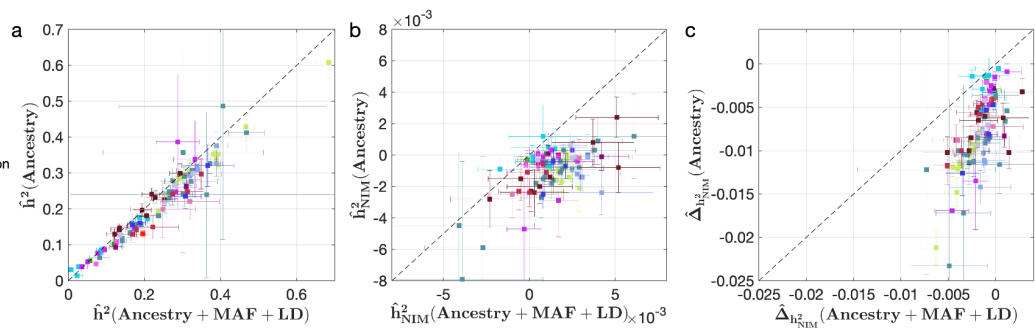

Supplement: supp [file elife-80757-supp-v1.zip]
