# Supplementary figures and images for: The lingering effects of Neanderthal introgression on human complex traits
Source: eLife journal article supplement (doi:10.7554/elife.80757), 2023-03-20

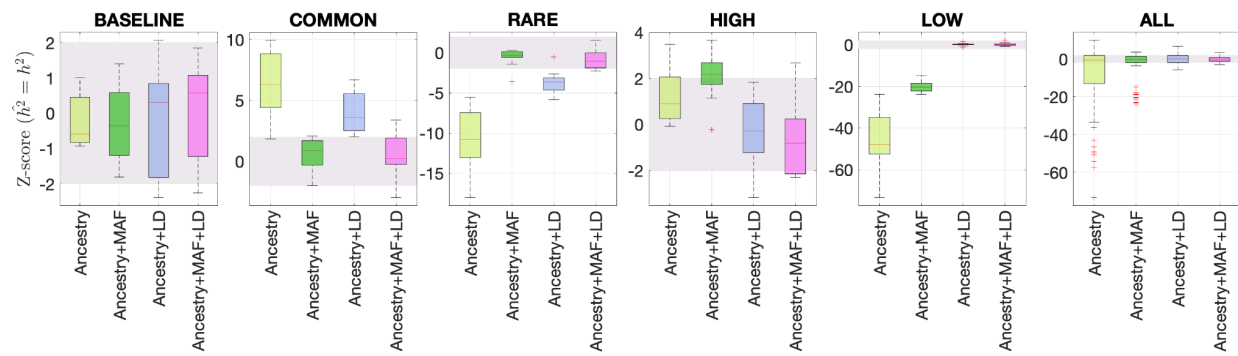

Supplement: supp [file elife-80757-supp-v1.zip]

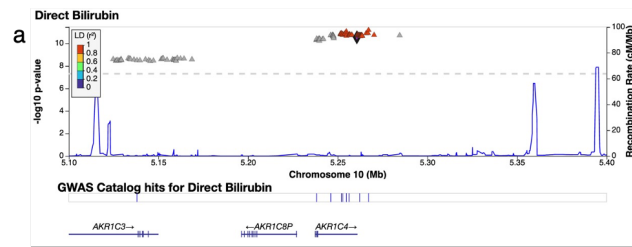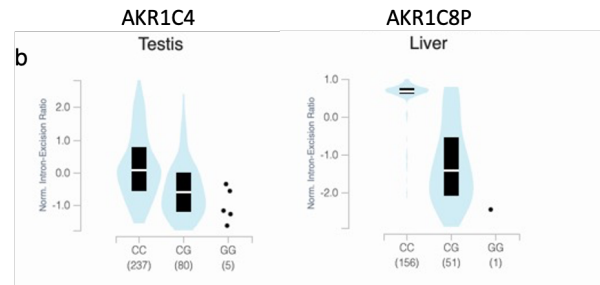

Supplement: supp [file elife-80757-supp-v1.zip]

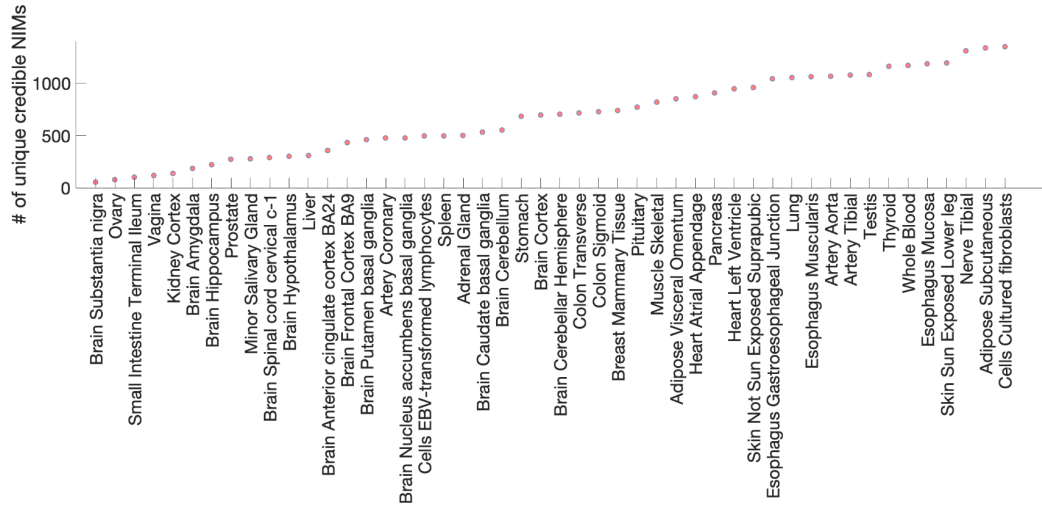

Supplement: supp [file elife-80757-supp-v1.zip]

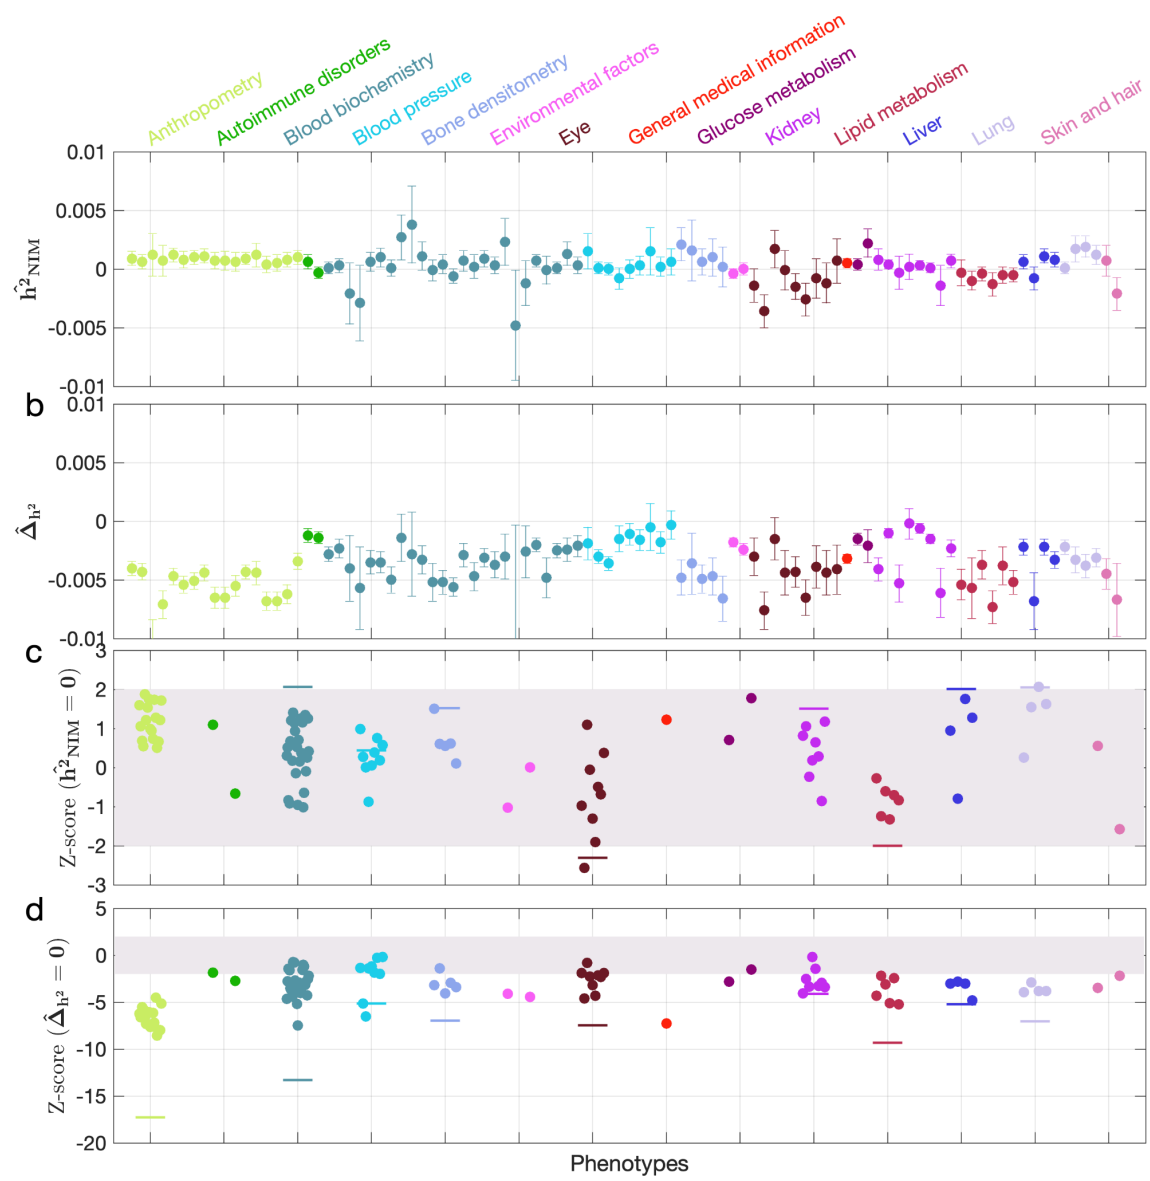

Supplement: supp [file elife-80757-supp-v1.zip]

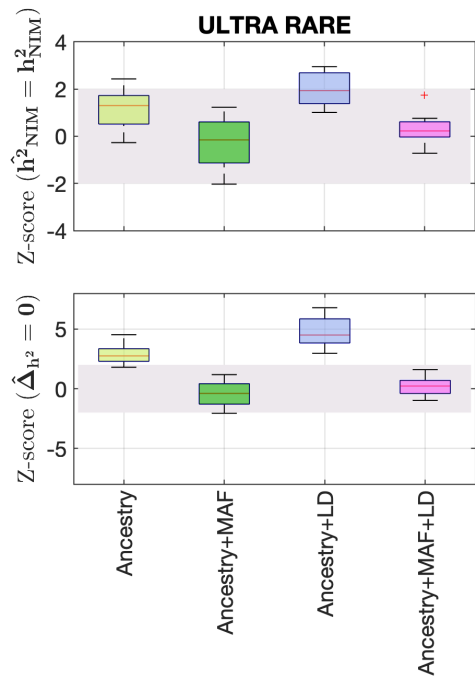

Supplement: supp [file elife-80757-supp-v1.zip]

# Gamma Glutamyltransferase

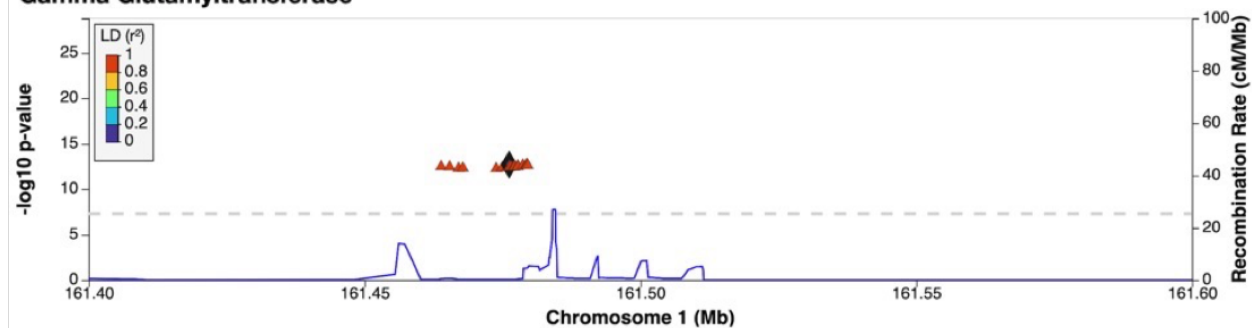

## GWAS Catalog hits for Gamma Glutamyltransferase

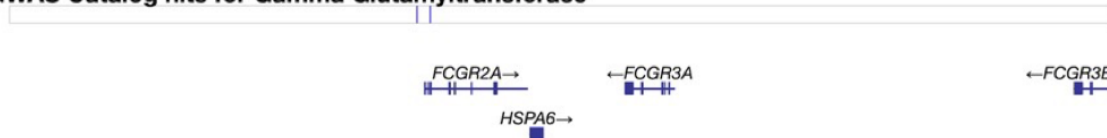

Supplement: supp [file elife-80757-supp-v1.zip]
